# Supplementary material for: Deep Learning Approach for Differentiating Etiologies of Pediatric Retinal Hemorrhages: A Multicenter Study
Source: MDPI journal article supplement (doi:10.3390/ijms242015105), 2023-10-12
Supplement: s1 [file s1]

## Supplementary Materials

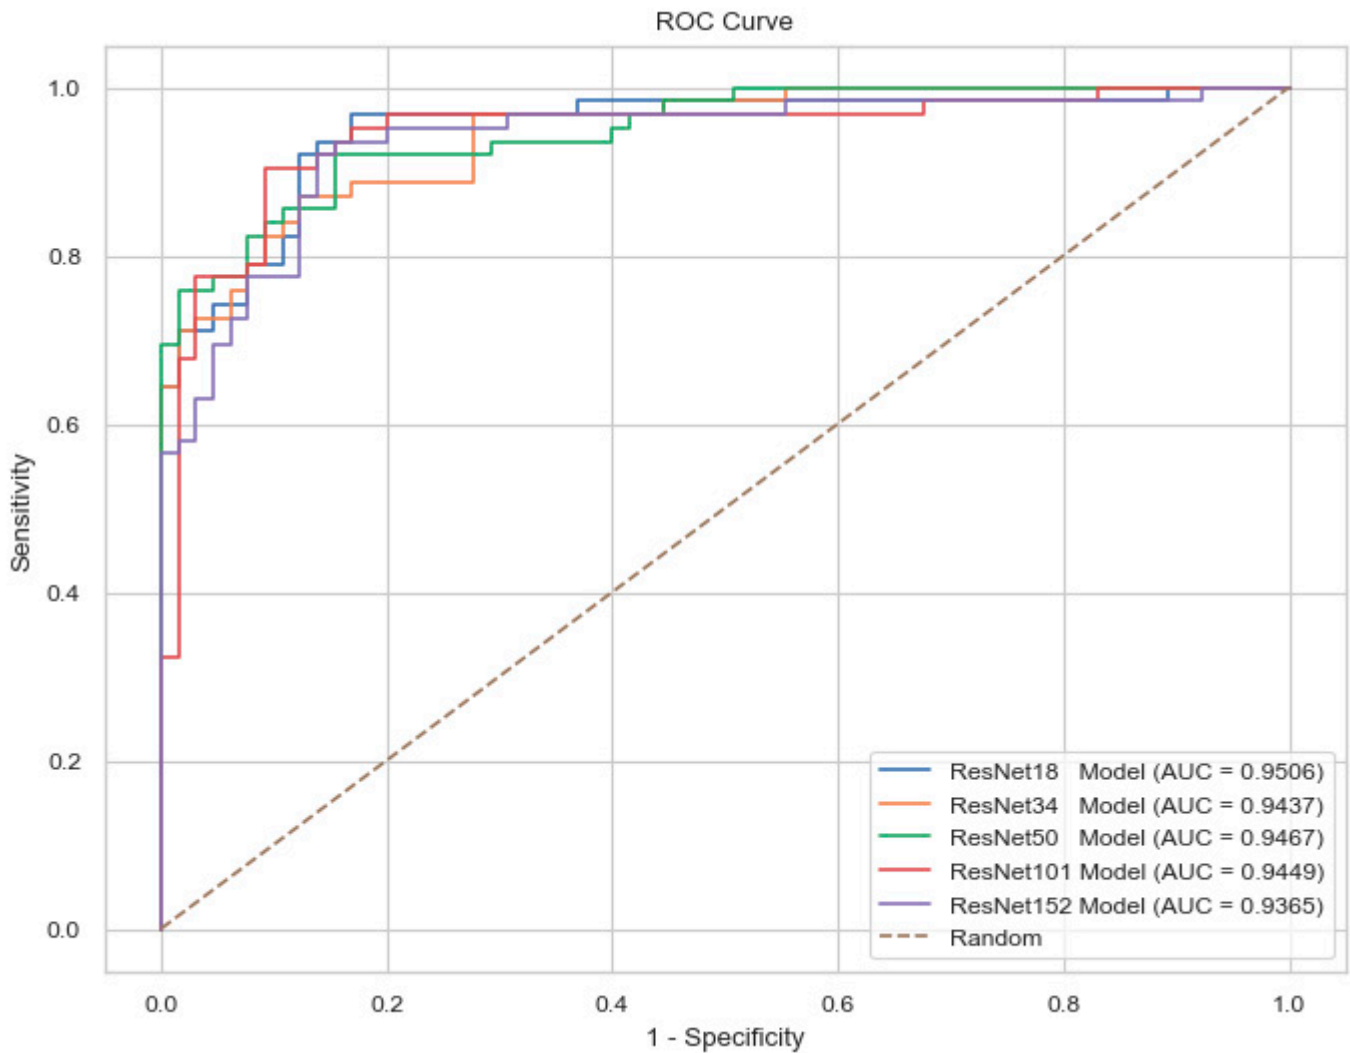

**Figure S1.** Under the Curve (AUC) Comparison of Various ResNet Models. This graph presents the AUC values achieved by different ResNet models, including ResNet18, ResNet34, ResNet50, ResNet101, and ResNet152, in the classification of pediatric retinal hemorrhages. The AUC scores reflect the models' performance in distinguishing between medical and trauma-induced retinal hemorrhages.

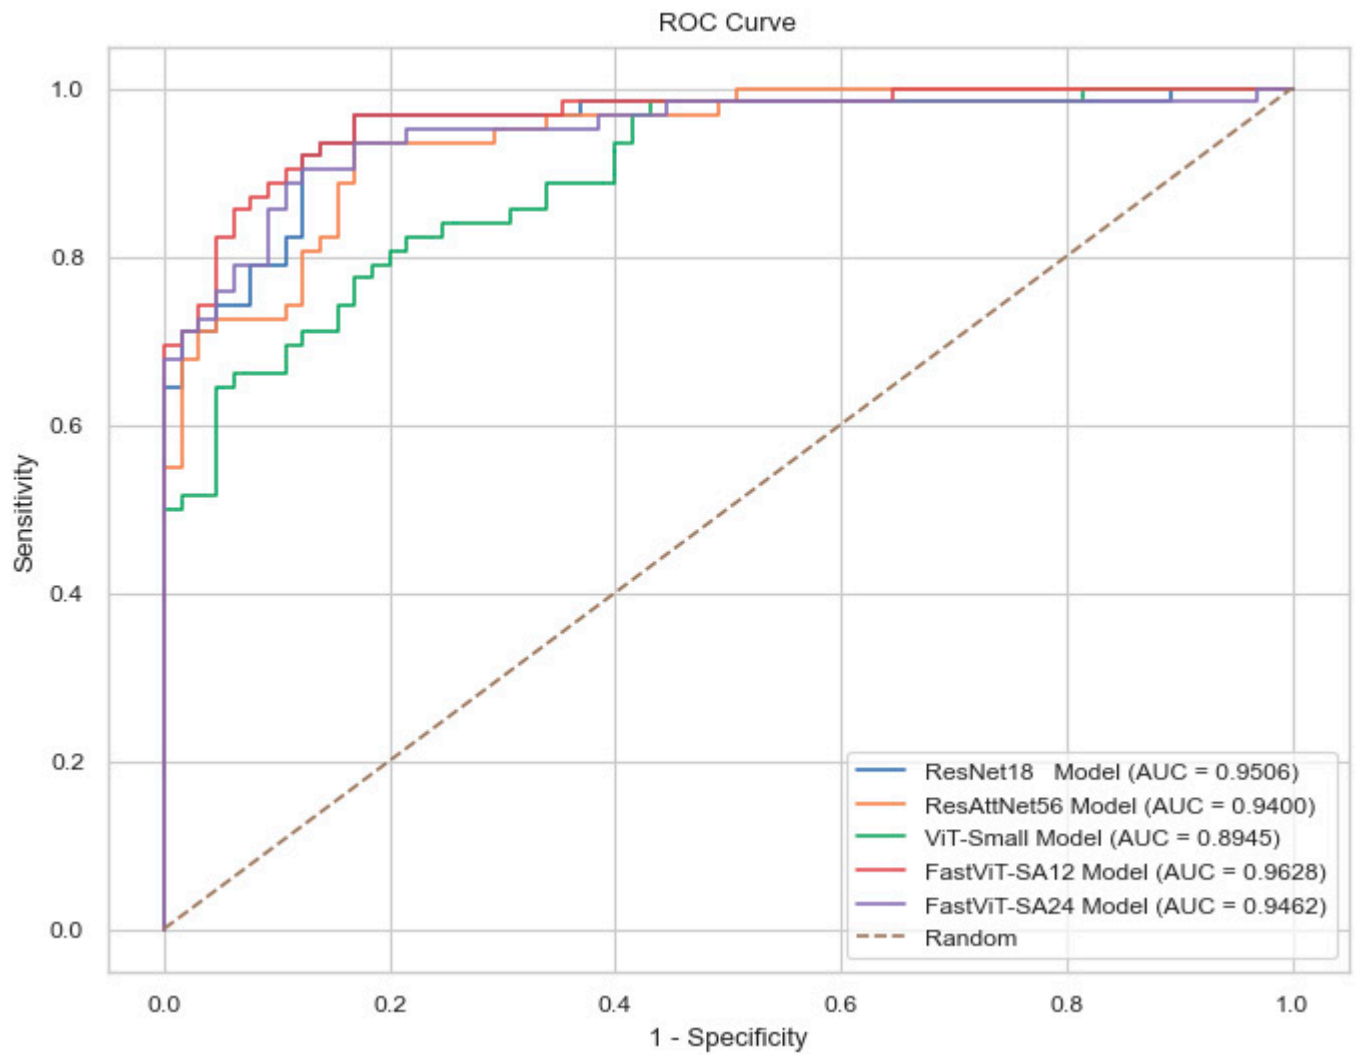

**Figure S2.** Under the Curve (AUC) Comparison of Top ResNet Model and Transformer Models. This graph presents the AUC values achieved by different Transformer models compared to top ResNet model, in the classification of pediatric retinal hemorrhages. The AUC scores reflect the models' performance in distinguishing between medical and trauma-induced retinal hemorrhages.

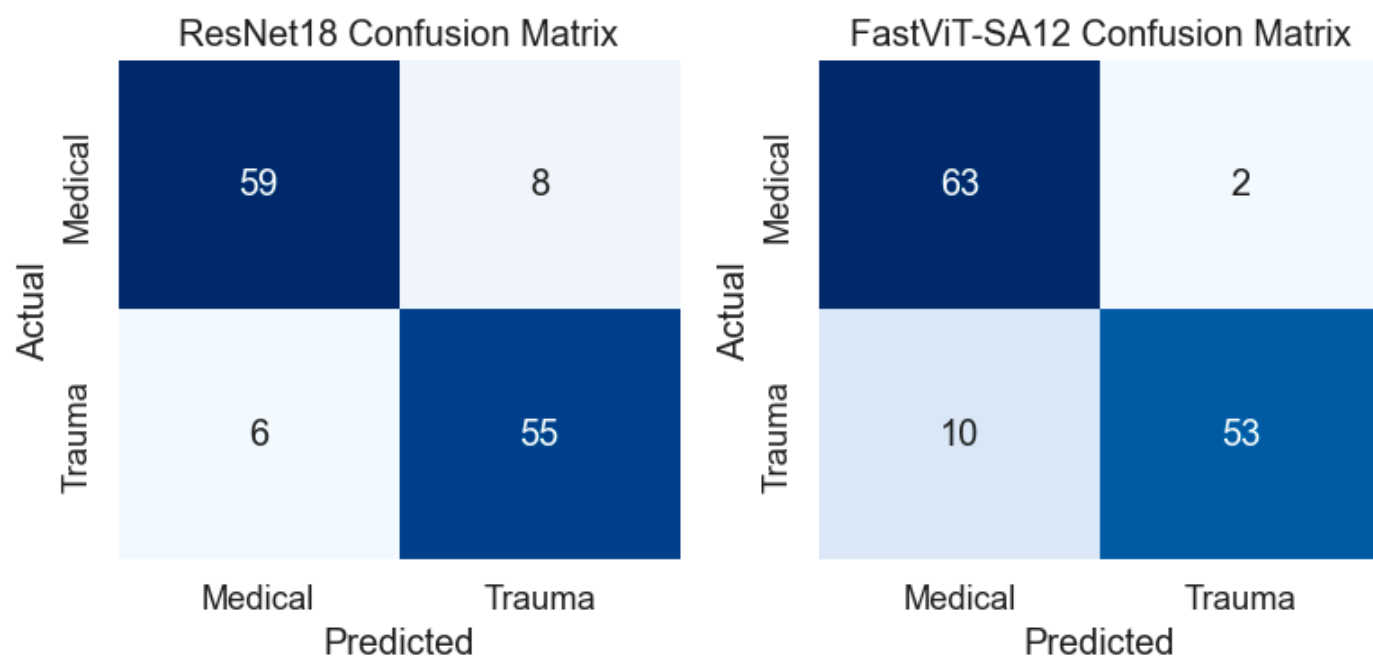

**Figure S3.** Confusion Matrices for Highest Sensitivity (ResNet18) and Best AUC (FastViT-SA12) Models. These matrices show the classification performance of ResNet18 (highest sensitivity) and FastViT-SA12 (highest accuracy and AUC) models in differentiating pediatric retinal hemorrhages into medical and trauma-induced categories.

**Table S1.** The ResNet models' misclassifications on the test subset categorized by diagnosis.

| <b>Diagnosis</b>                | <b>ResNet18</b> | <b>ResNet34</b> | <b>ResNet50</b> | <b>ResNet101</b> | <b>ResNet152</b> |
|---------------------------------|-----------------|-----------------|-----------------|------------------|------------------|
| Total misclassifications        | 14              | 17              | 16              | 13               | 15               |
| Medical misclassified as trauma | 8               | 10              | 9               | 7                | 8                |
| Retinal Vascular Disease        | 2               | 2               | 3               | 1                | 2                |
| Leukemia                        | 4               | 5               | 4               | 4                | 4                |
| Papilledema                     | 0               | 0               | 0               | 0                | 0                |
| Coagulopathy                    | 2               | 3               | 2               | 2                | 2                |
| Trauma misclassified as medical | 6               | 7               | 7               | 6                | 7                |
| Accidental Trauma               | 2               | 2               | 2               | 2                | 2                |
| Birth Trauma                    | 0               | 0               | 0               | 0                | 0                |
| Abusive Head Trauma             | 4               | 5               | 5               | 4                | 5                |

**Table S2.** The ResNet18 and Transformer models' misclassifications on the test subset categorized by diagnosis.

| <b>Diagnosis</b>                | <b>ResNet18</b> | <b>ResAttNet56</b> | <b>ViT-Small</b> | <b>FastViT-SA12</b> | <b>FastViT-SA24</b> |
|---------------------------------|-----------------|--------------------|------------------|---------------------|---------------------|
| Total misclassifications        | 14              | 16                 | 26               | 14                  | 15                  |
| Medical misclassified as trauma | 8               | 11                 | 12               | 2                   | 8                   |
| Retinal Vascular Disease        | 2               | 1                  | 3                | 0                   | 2                   |
| Leukemia                        | 4               | 7                  | 7                | 2                   | 5                   |
| Papilledema                     | 0               | 0                  | 0                | 0                   | 0                   |
| Coagulopathy                    | 2               | 3                  | 2                | 0                   | 1                   |
| Trauma misclassified as medical | 6               | 5                  | 14               | 10                  | 7                   |
| Accidental Trauma               | 2               | 3                  | 3                | 3                   | 2                   |
| Birth Trauma                    | 0               | 0                  | 0                | 0                   | 0                   |
| Abusive Head Trauma             | 4               | 2                  | 11               | 7                   | 5                   |
